# Supplementary material
Source: PubMed Central journal article supplement (PMC2751965)
Supplement: tpc.108.064519_1.pdf [file tpc.108.064519_1.pdf]

## Cheng\_Sup Fig1

MOS7 1 : MKFNFN**ETEDAPDSRRSPTPKPEV**RVVPIQSHPVFASLP-----SSQDEPAVS**QIFPRNEM**AWDGD**SRVYYWDSRRYL** : 73  
hNup88 1 : --MAAA**EGPVG**DGELWQTWLPNHV**VFLRLREGIK**NQSPTEAEKPAS**SSLPSSPE**Q**LLTRNVV**FGLGG-**ELFIW**LGEDSS : 77  
Mbo 1 : --**MSLTD**-----**VLEINKTELEAKIRNGI**-----**EVVQRTQNLIDCKDI**-**LLHAW**HAKDSC : 48

MOS7 74 : **LHRLSIRL**GEPEPSSVLA**AVPSKVMQ**EDLQV**TF**SVSK**ISINKSGS**AVILLAGSD**IGICVMYL**---**FGRASVIEEN**---**VICR** : 147  
hNup88 78 : **FLVVRLR**-**GPSGGG**EFPALS**QYCRIL**CIN**PPLFEI**YQV**LLSPTQ**HHV**ALIGIRGIM**VLE**LPRWGKNSEFE**CG**CHSTVNC**S : 156  
Mbo 49 : **LLVRNWR**-**SSLAAKVN**---**IQFQTLI**ES**SLVSL**EVDRV**IASNEGS**IV**ALS**CP**RCV**IMEL**PRWCP**DG**YYK**DGR**PVITCR** : 124

MOS7 148 : **VVSGSEI**YTSSD**SAITILQ**AS**WHEP**---**SDTHIG**IL**SSDA**VER**LFDLSSD**TE**LP**QEY**YLQPC**EP**GRS**RTASS**IYP**AD**ES** : 225  
hNup88 157 : **TPVAER**FTSS-**TSLTLK**HAA**WYSE**ILDP**HVVLLT**SDNV**IRIY**---**SLR**EPQ**TPTNV**II**LSEAE**-----**EESL**VLN : 225  
Mbo 125 : **TFGIDT**QL**FLKN**-**PHLEVR**QVR**WEH**SVSD**STLLV**LL**NNNTIR**VY**NH**SK**LRFV**VQ**VGPPV**LRS**GANN**SLC**DFG**EL**AVDFD** : 203

MOS7 226 : **FGGDHL**WDRFT**VFILF**T**DGSIY**ILCP**VV**FG**SVYK**WES**VMEI**YN**DAN**MY**GKSN**SL**AVS**NS**SLAIE**W**LE**AT**FPD**IT**EQC** : 305  
hNup88 226 : **KC**-----**RAY**TAS**LGET**AV**AF**FG-**PL**LAV**PKTL**FG**Q**N---**GR**DEV**VAY**PLY**ILY**ENG : 274  
Mbo 204 : **IA**-----**PA**AK**PRV**TE**PE**T**AG**NET**TLD**K**SNK**TI**VAAK**SL**PK**Q**ERIE**W**MV**V**IRE**NG : 255

MOS7 306 : **TRGENI**L**VVKAQ**F**YALL**DAS**LAL**OG**PLYK**ASS**DGDE**FA**VREAE**CK**GRAV**SI**LYN**LV**SKDS**II**VT**AWS**AGCI**Q**VD**AL**VD** : 385  
hNup88 275 : **ETFLV**Y**ISIL**H**SE**----**GNI**WK**AVG**SI**AHAS**A**EDN**-----**YGD**AC**AVL**CL**PC**VEN**LI**V**IAT**ES**GMTY**HC**VVLE** : 340  
Mbo 256 : **N**---**IY**IL**MT**GV**D**---**SEN**TR**LQ**CP**V**TIT**Q**ED**N**-----**YGL**ES**CA**IM**IIP**SL**EP**TI**VIA**ES**NG**K**IR**H**ALL**ME : 318

MOS7 386 : **EIQPV**WIS**GNSS**RL**RMS**SH**KIQ**VAM**ICES**NI**SEL**PV**ATS**NI**ED**HT**VWL**GH**PP**ELL**RL**AM**VDL**AL**PKM**RE**GS**IV**TIF** : 465  
hNup88 341 : **GPE**-----**ED**DHT**SP**K**WDS**R**ID**L**IP**-**SL**Y**V**FE**CV**EL**EL**AL**K**LAS**EDD**ED**FD**-----**SD**F**SC**P**VK**LI**H** : 396  
Mbo 319 : **AEA**-----**TE**HS**FNE**V**DD**SV**L**IE**PA**EY**VV**H**V**LE**T**VE**LE**EL**GIS**AP**AT**G**KE**-----**GC**NP**PI**Y**LK** : 371

MOS7 466 : **ADSL**LE**ERI**YS**LH**CG**ID**ST**V**L**H**SI**P**FT**SQ**AS**CK**-----**DE**AL**KTP**SV**H**TV**L**ST**CQ**EE**SA**V**S**PI**IG**V**PL**SD**SF** : 534  
hNup88 397 : **RD**PK**CE**SR**YH**CT**HE**RG**VH**SV**GL**T**W**HK**LH**K**FL**GS**DE**ED**KD**SL**Q**EL**ST**E**Q**CF**VE**IL**CT**R**PL**PC**RQ**P**AP**IR**G**W**IV**PL**IL** : 476  
Mbo 372 : **BD**L**INE**LR**YF**AY**HN**AG**LH**AV**TV**SE**IA**EL**Q**RY**LE**SE**DE**---**DR**EL**AV**SA**SA**Y**IL**CT**K**F**DS**SE**T**V**NA**VE**L**AL**L**Q**IP**A : 447

MOS7 535 : **GYS**W**IV**AV**LSS**GE**CI**VA**EM**K**T**WD**LL**PI**H**V**ST**DK**TV**SS**A**IE**K**---**KE**Q**EN**SC**I**ISK**EL**AG**PK**RI**APH**AL**PN**QR**STP** : 610  
hNup88 477 : **GP**-**TM**IC**IT**ST**YE**CL**I**W**PL**LL**ST**V**H**PA**SP**PL**LCT**RE**IV**EA**ESS**LR**V**LA**ET**PD**SE**K**H**IR**S**IL**Q**RS**VAN**FA**FL**K**ASE**K**DIA** : 555  
Mbo 448 : **G**---**IV**LL**IG**SG**Q**V**IS**L**K**L**V**DA**Q**LL**V**T**PN**EN**K**P**V**D**SE**V**S**Q**Q**-----**ES**GP**PE**V**DT**IK**S**LL**Q**RS**VN**Q**P**IL**AD**K**L**S---**S** : 515

MOS7 611 : **ANS**VE**GR**S**IL**LD**Y**K**L**EH**EN**Y**IE**Y**A**HK**V**H**F**EL**CH**EA**PN**K**RI**ID**CH**Q**R**LA**EAN**E**K**ISK**VE**KN**Q**S**FL**E**K**R**ID**K**AI**ER**HDS** : 690  
hNup88 556 : **PP**PE**CL**Q**LL**SR**AT**Q**V**FR**EQ**Y**LL**Q**DI**AK**EP**IQ**RV**K**L**IC**D**Q**KK**Q**LED**LS**Y**CR**EER**K**S**IR**EM**A**ER**L**AD**K**Y**EE**A**KE**K**Q**ED** : 635  
Mbo 516 : **PS**AC**ES**F**ELL**N**Q**AI**EV**L**RE**Q**Y**L**K**R**H**DL**V**RA**A**FT**RE**IN**Q**IQ**L**K**TE**Q**L**Q**EL**Q**D**LE**Q**ER**EL**S**ER**HK**L**A**ER**FE**E**IS**YN**Q**EL** : 595

MOS7 691 : **TE**Q**CL**Q**R**IR**SL**PG**TH**HK**PI**TR**AE**LD**FK**SE**LD**Q**Y**AG**VE**VD**AL**Q**SS**TE**TL**RR**AV**K**ST**Q**K**SH**K**GT**V**VA**AS**CK**K**Q**Y**SK**N**LI**Q** : 770  
hNup88 636 : **IM**NR**MK**IL**LH**S**F**SE**LP**V**L**SD**S**ER**EM**K**K**EL**QL**IP-**D**QL**R**H**L**GN**A**K**Q**VT**M**K**K**Y**Q**Q**K**-----**ME**K**V**L**S**-**I**PK**PT**II**L**S : 707  
Mbo 596 : **L**VR**K**NA**IM**Q**R**AN**AS**LE**NS**V**IE**RE**ES**CE**V**IR**LN**-**K**VT**Q**SL**A**AG**LE**T**AK**KT**FN**K**Q**RY**H**-----**IA**Q**S**Q**ED**IK**N**AY**EL**P : 668

MOS7 771 : **DT**Q**MS**Q**L**Q**ST**L**AK**LS**LM**NS**D**NS**K**V**R**IV**ESA**L**K**S**Q**ESS**FM** : 810  
hNup88 708 : **AY**CR**K**CI**Q**S**IL**KE**EG**EH**IRE**M**V**EQ**IND**IR**NH**V**NF**----- : 741  
Mbo 669 : **E**K**CH**RT**ITE**IT**EQ**IT**GE**ID**R**Q**IT**D**V**RR**INK**IV**GI**----- : 702

**Supplementary Figure 1. Amino acid alignment of MOS7, human Nup88, and *Drosophila* Nup88.**

Amino acid sequences from *Arabidopsis* MOS7 (accession number NP\_196187), *Drosophila* DNup88 (Mbo; accession number NP\_524330), and human hNup88 (accession number NP\_002523) were aligned using ClustalW2 (Larkin et al. 2007). Sequence identities and similarities were shaded using Genedoc. Red bar indicates the 4 amino acids deleted in mos7-1. Identical amino acids are shaded in black, and amino acids with similar properties are shaded in grey.

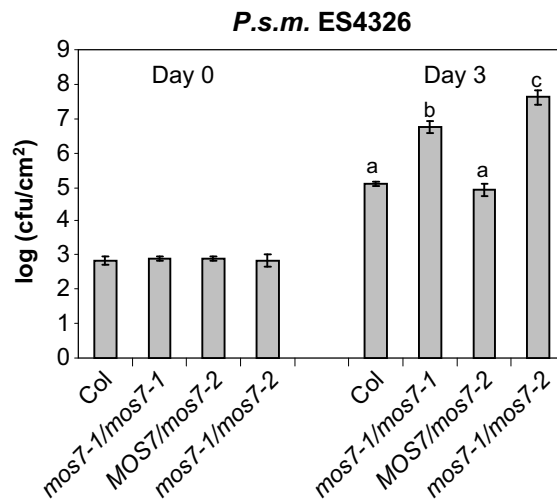

**Supplementary Figure 2. Allelism test between *mos7-1* and *mos7-2* using *P.s.m.* ES4326.**

F1 plants from *mos7-1* × *mos7-2* that carry one copy of each mutation were challenged with *P.s.m.* ES4326 at OD<sub>600</sub> = 0.0001. Leaf discs within the infiltrated area were taken at Day 0 and Day 3 to measure the bacterial growth in the leaves. Data were analyzed by one-way ANOVA. Different letters indicate statistically significant differences between genotypes. The bars represent averages of four replicates ± SD.

## Cheng\_Sup Fig3

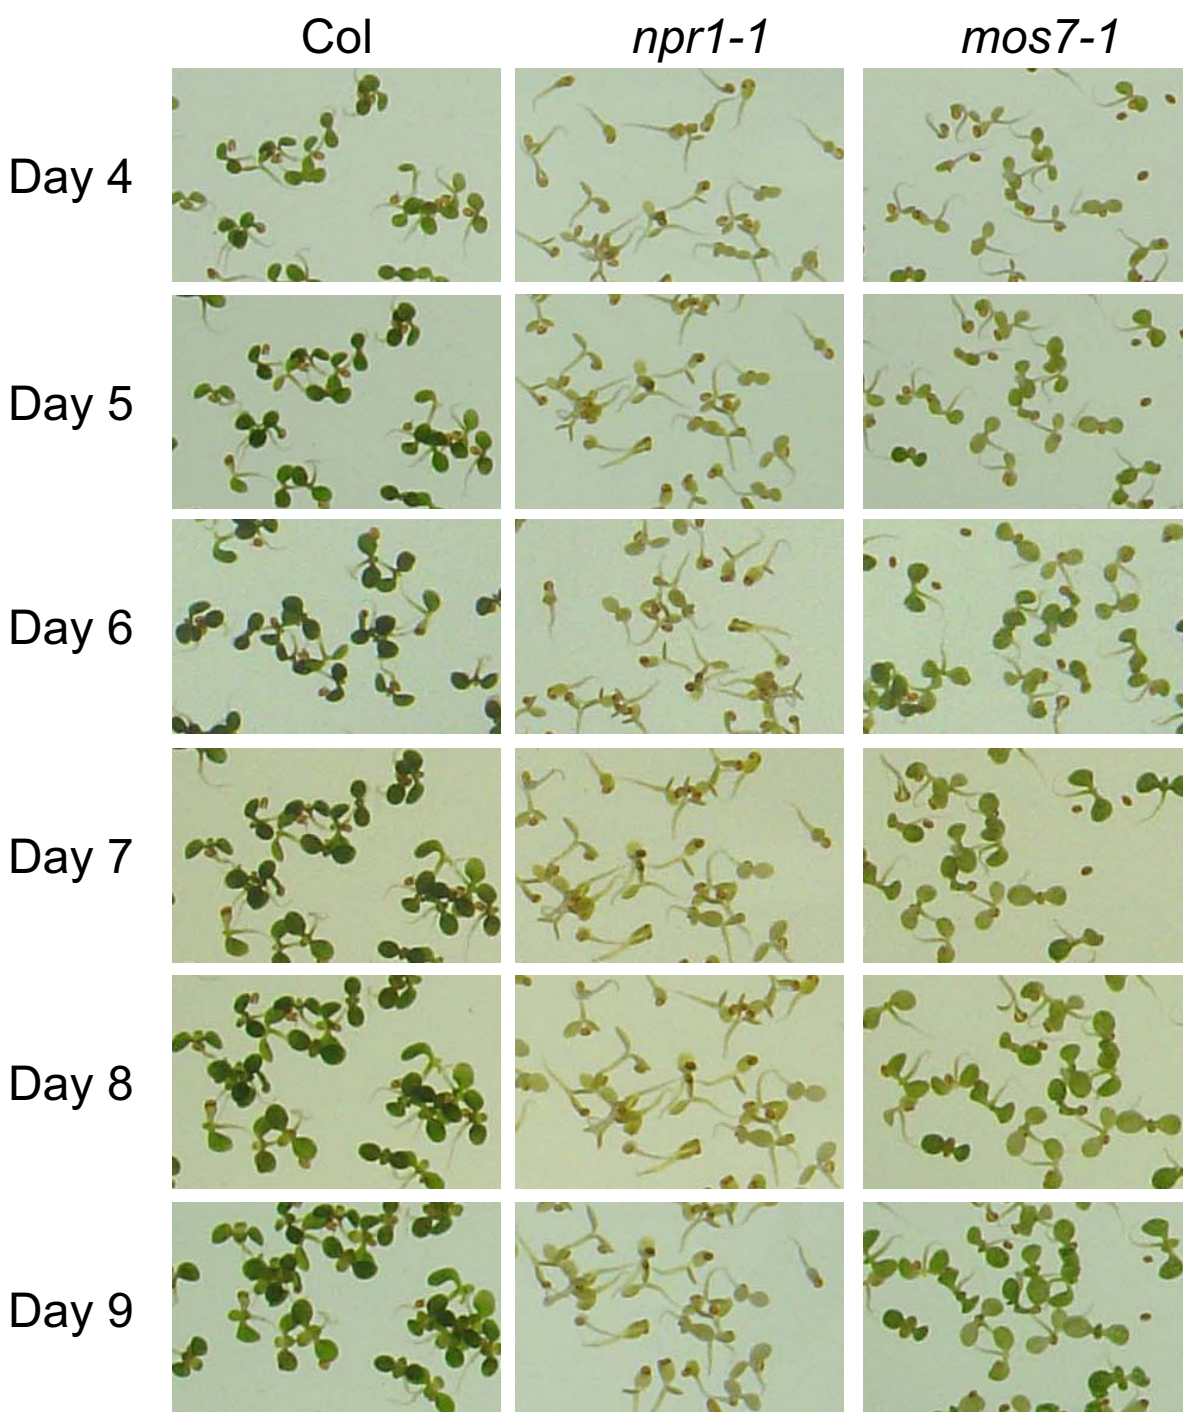

**Supplementary Figure 3. Tolerance of Col, *npr1-1*, and *mos7-1* plants to high concentrations of SA.** Seeds were plated on MS medium containing 0.2 mM SA, and the pictures were taken from 4 to 9 days after germination.

## Cheng\_Sup Fig4

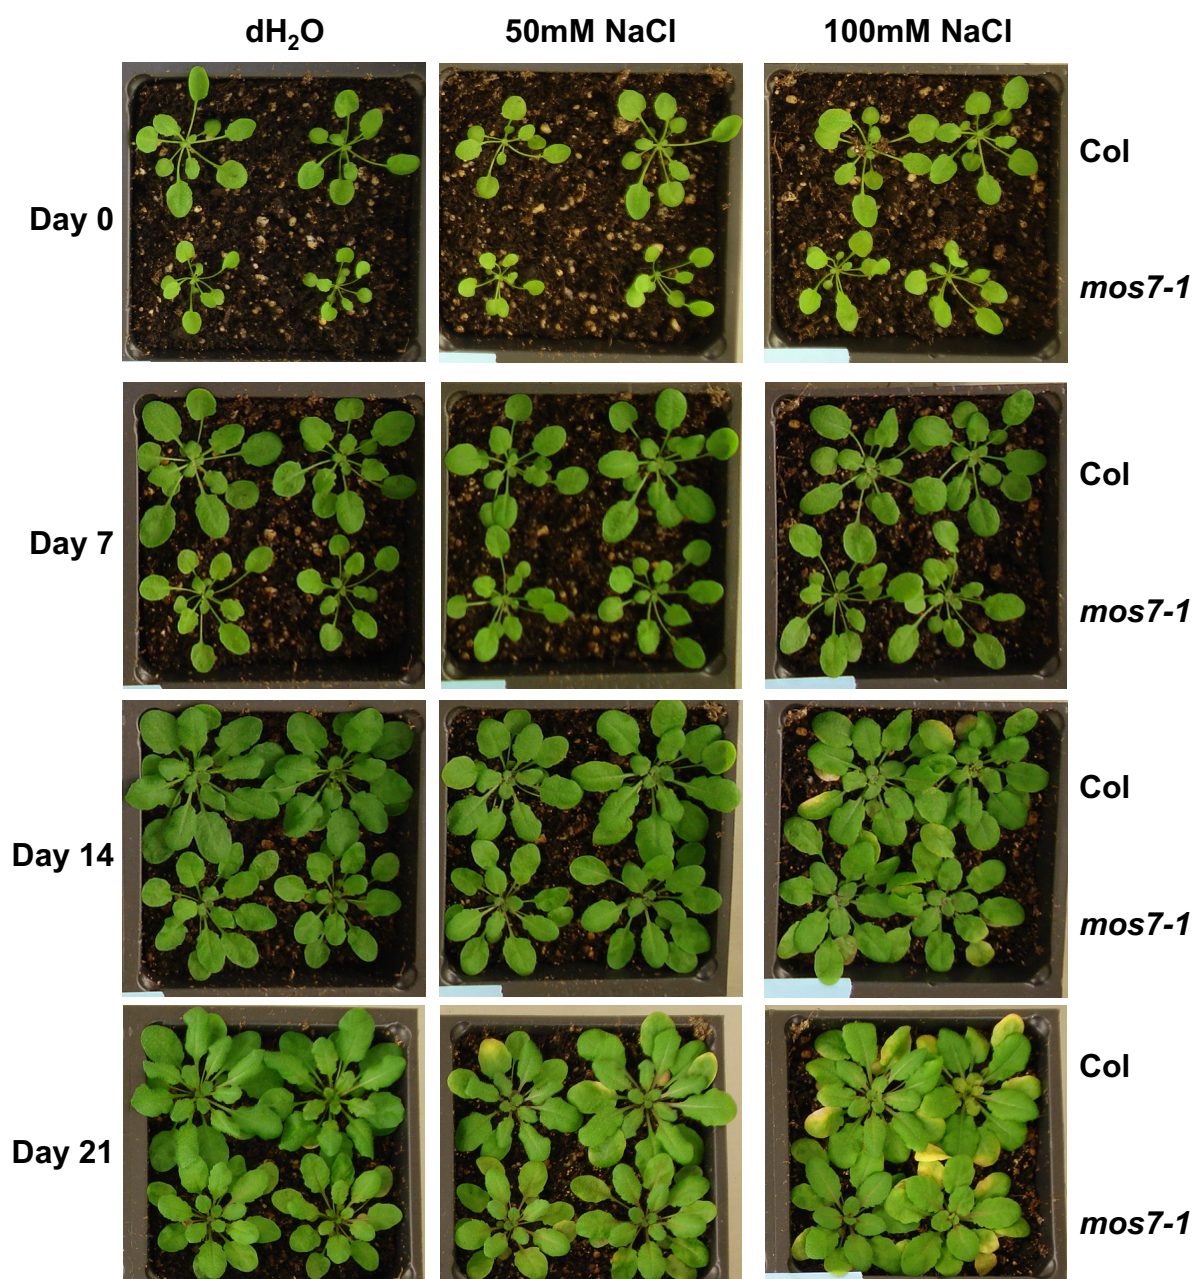

**Supplementary Figure 4. Tolerance of Col and *mos7-1* plants to high concentrations of sodium chloride.** Plants with 8 to 10 rosette leaves were flooded every 3 days with either distilled water (dH<sub>2</sub>O; control), 50mM or 100mM NaCl solution (Wu et al., 1996).

## Cheng\_Sup Fig5

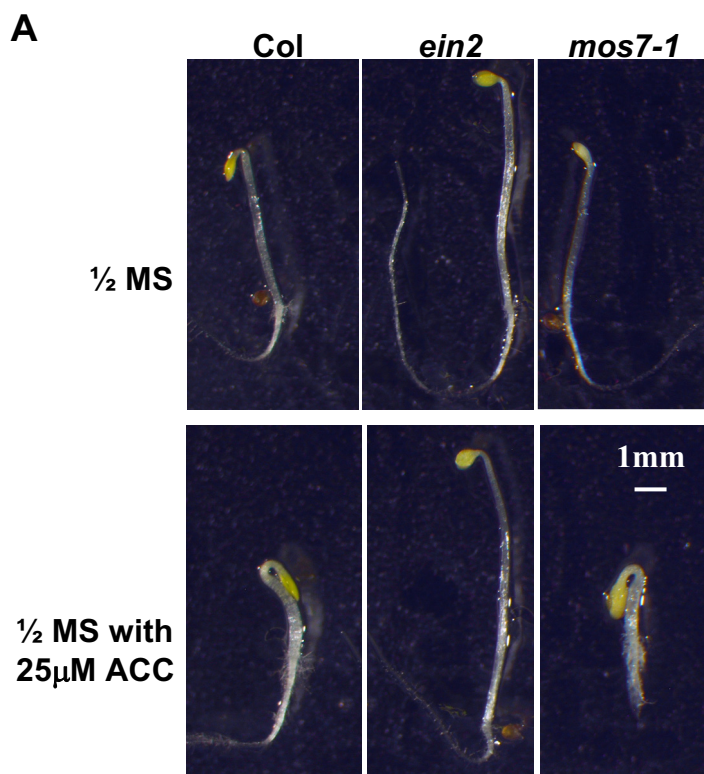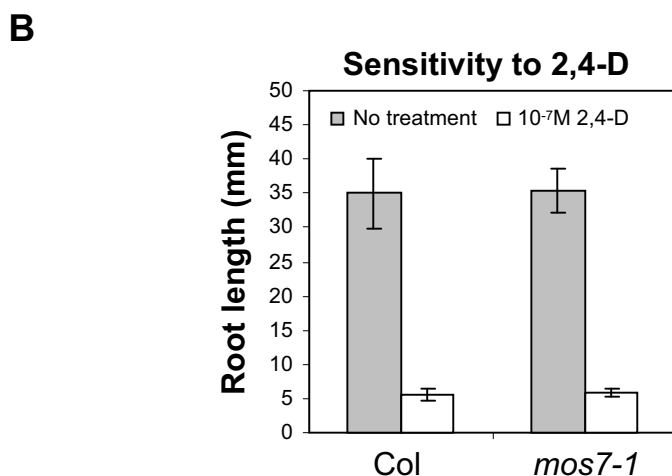

### Supplementary Figure 5. Hormonal assays on *mos7-1*.

(A) Sensitivity of indicated genotypes to 25 $\mu$ M ACC (1-Aminocyclopropanecarboxylic acid). The experiment was carried out as described in Guzman and Ecker (1990) with minor modifications. In brief, seeds were sown on the specified plates and vernalized in the dark at 4 $^{\circ}$ C for 72 h. The plates were placed in constant white light at 22 $^{\circ}$ C for 6 hr and then placed in the dark at 22 $^{\circ}$ C maintaining the same orientation and allowed to grow vertically for 3 more days. Representative plants are shown.

(B) Sensitivity to the auxin analog, 2,4-D (2,4-Dichlorophenoxyacetic acid). Seedlings used for root length assay were grown as described in Lincoln et al. (1990) with modifications. In brief, seeds were first sown on  $\frac{1}{2}$ MS plates and cold treated for 72h. Seeds were allowed to germinate for 3 days on  $\frac{1}{2}$ MS plates and transferred to specified plates. Root lengths were measured 7 days after germination.

## Cheng\_Sup Fig6

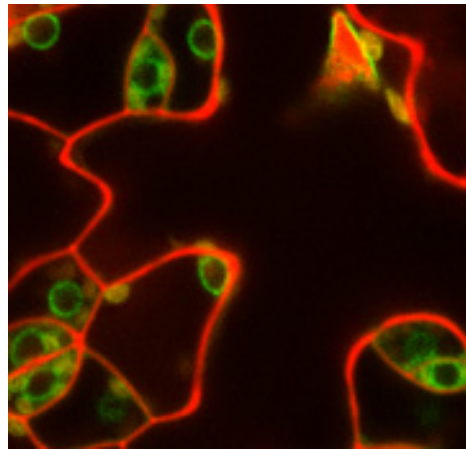

***35S::mos7-1-GFP***

**Supplementary Figure 6.** Subcellular localization of mos7-1-GFP fusion proteins in leaf pavement cells. Plant cell walls were stained with 5mg/ml propidium iodine (red).

## Cheng\_Sup Fig7

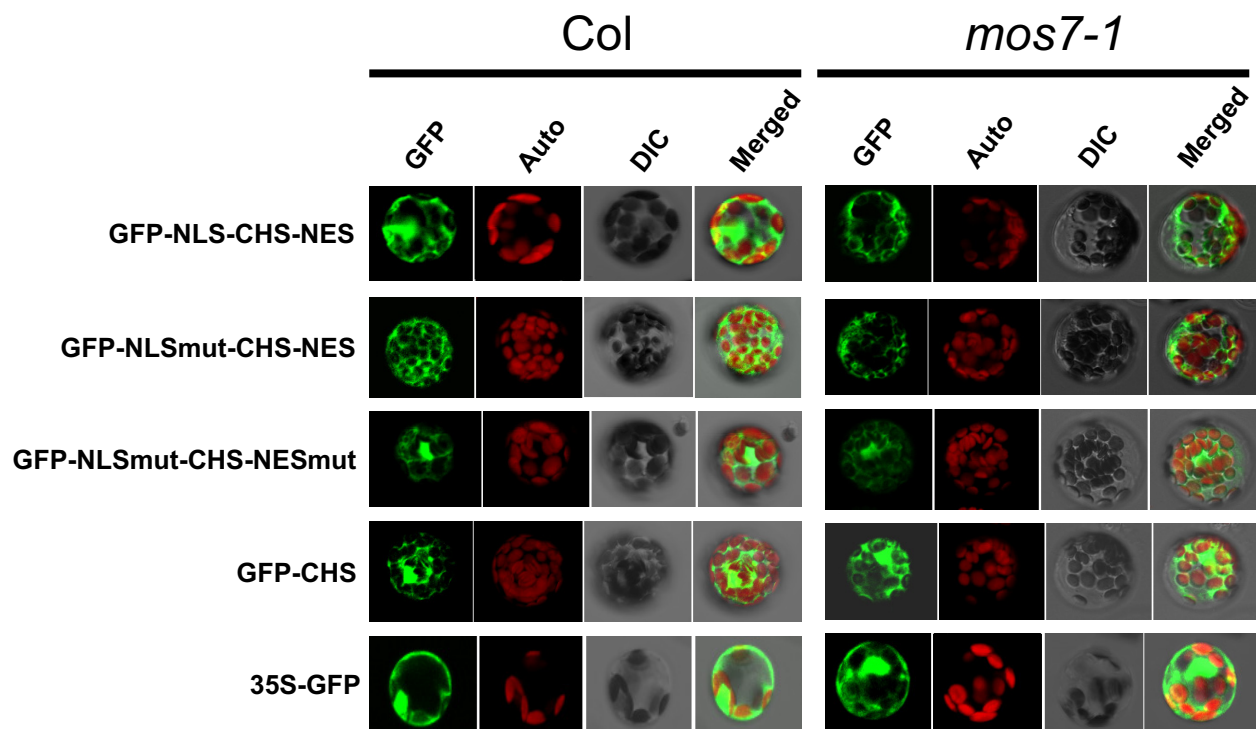

**Supplementary Figure 7. *In vivo* nuclear transport assay of chalcone synthase (CHS) fused to GFP.**

Arabidopsis protoplast were transiently transformed with CHS-GFP constructs (Haasen et al., 1999) and analyzed for GFP localization by confocal microscopy.



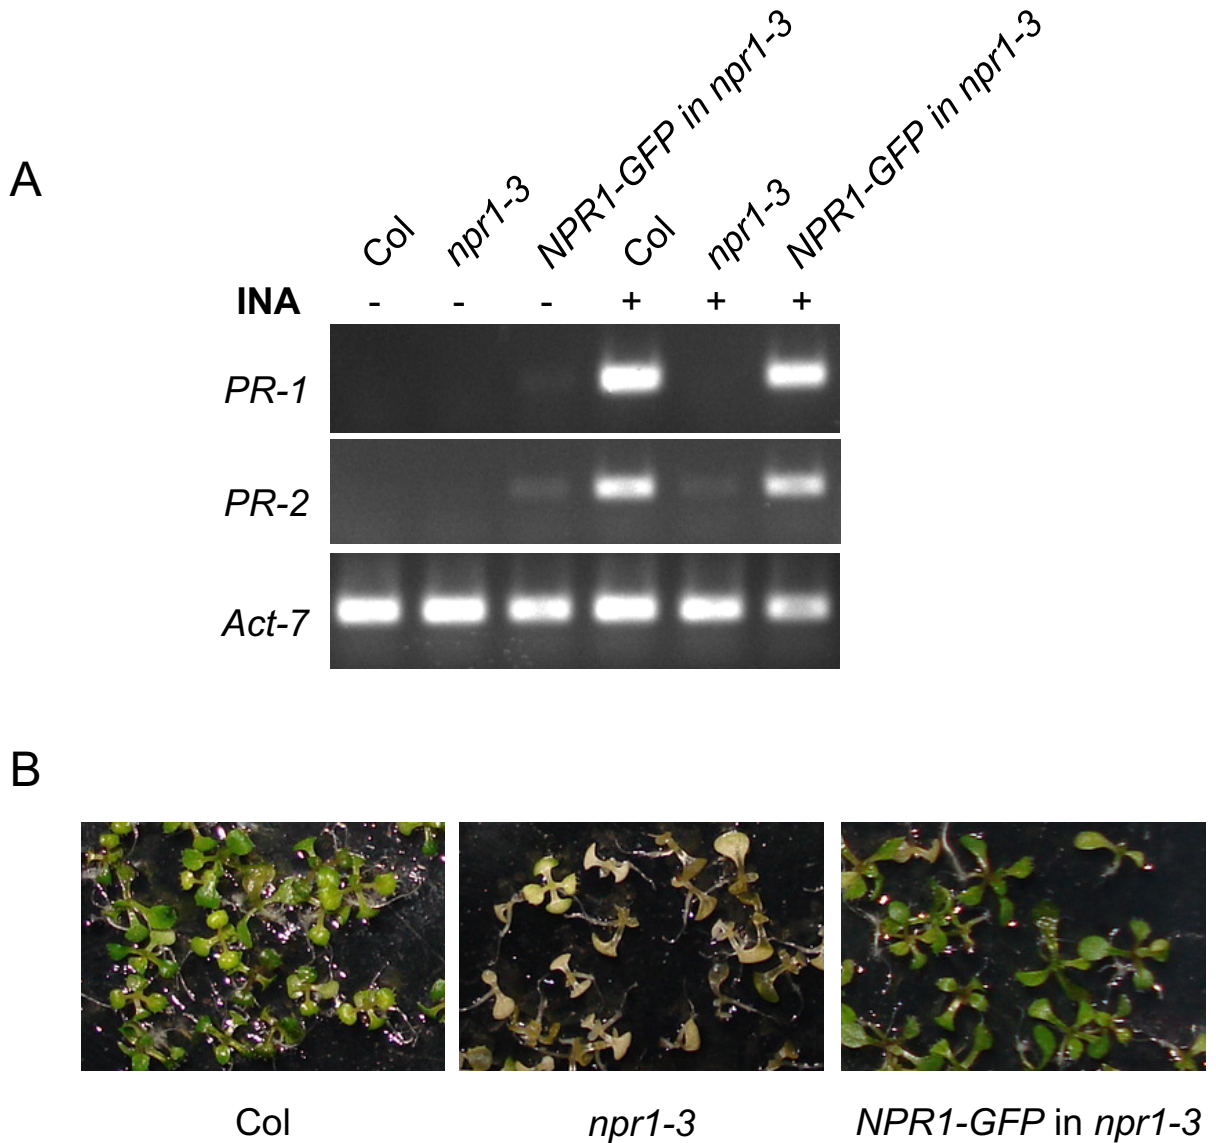

**Supplementary Figure 8. Complementation of *npr1-3* by *NPR1-GFP* expressed under the control of its native promoter**

(A) *PR* gene expression in the indicated genotypes. Total RNA was prepared from three week-old plants grown on MS medium in the presence (+) or absence (-) of 50  $\mu$  M INA and reverse transcribed to obtain total cDNA. The cDNA samples were normalized by real-time PCR using *Actin7* (*Act-7F*: GGTGTCATGGTTGGTATGGGTC and *Act-7R*: CCTCTGTGAGTAGAACTGGGTGC).

*PR-1*, *PR-2*, and *Actin7* were amplified by 28, 30 and 30 cycles of PCR, respectively, using equal amounts of total cDNA and the products were analyzed by agarose gel electrophoresis with ethidium bromide staining.

(B) Tolerance of Col, *npr1-3*, and *npr1-3* transformed with *NPR1-GFP* to high concentrations of SA. Seeds were plated on MS medium containing 0.2 mM SA and the pictures were taken 10 days post germination.

## Cheng\_Sup Fig9

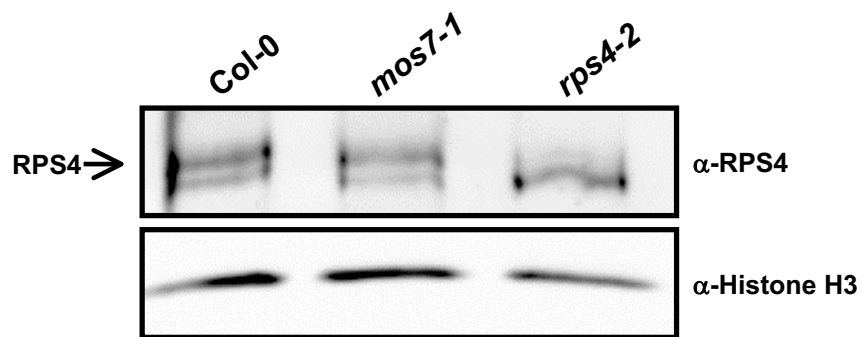

### Supplementary Figure 9. Nuclear RPS4 in *mos7-1*.

Immunoblot analysis of RPS4 in nuclear protein extracts of unchallenged leaf tissues. Equal loading was monitored by probing the membrane with anti-Histone H3.

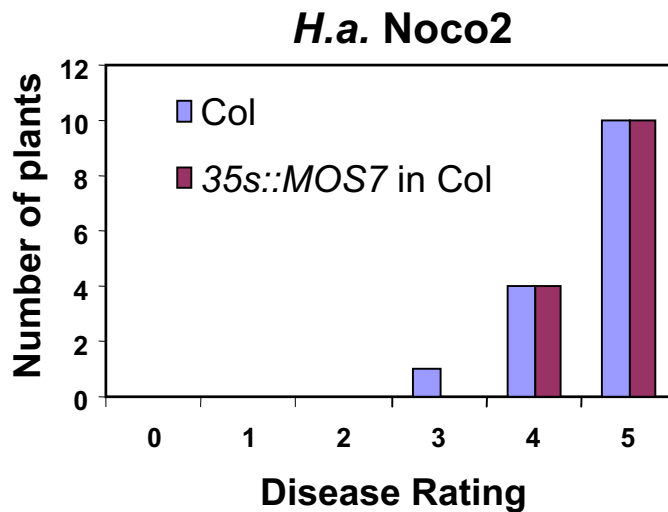

**Supplementary Figure 10. Over-expression of *MOS7* does not lead to enhanced disease resistance.**

Resistance of Col and T1 plants from *35S::MOS7* in Col against *H.a. Noco2*. The infection was rated on plants 7 days after infection by counting the number of conidiophores per infected leaf: 0, no conidiophores on the plants; 1, no more than 5 conidiophores per infected leaf; 2, 6 to 20 conidiophores on a few of the infected leaves; 3, 6 to 20 conidiophores on most of the infected leaves; 4, 5 or more conidiophores on all infected leaves; 5, 20 or more conidiophores on all infected leaves. The experiment was repeated once with similar result.

**Supplemental Table 1. Molecular markers used for map-based cloning of *mos7-1*.**

| Marker name | Primer Name | Primer Sequence (5'→3') | Polymorphism (Col-0/Ler) |
|-------------|-------------|-------------------------|--------------------------|
| K18I23      | K18I23-F    | AGATTCCAGCTCCGACGATG    | 172bp/205bp              |
|             | K18I23-R    | ACGCGCCAAAAGTGCGTGTC    |                          |
| MOP10       | MOP10-F     | CTACATGTCCATAGAACCTTC   | 118bp/129bp              |
|             | MOP10-R     | CAGTTCTATCATGTATCCACC   |                          |
| MJJ3        | MJJ3-3F     | TCTGACTCAATATGAGAGTCC   | 117bp/108bp              |
|             | MJJ3-3R     | ATAACTTTATGGGCTGCAGTG   |                          |
| K18J17      | K18J17-F    | CGCGATTAAAGATCCGGTA     | 119bp/107bp              |
|             | K18J17-R    | TCGAGCAATAAGAGTGATTCC   |                          |
| MHF15       | MHF15-F     | CAGAAAGGTCATGAAACCTAG   | 212bp/159bp              |
|             | MHF15-R     | GAGCACCAATAAGGTTTCCTC   |                          |
